# Supplementary material
Source: Springer Nature journal article supplement (https://www.springermedizin.de/resource/supplementary/13002_2012_292_MOESM2_ESM.pdf/9627558)

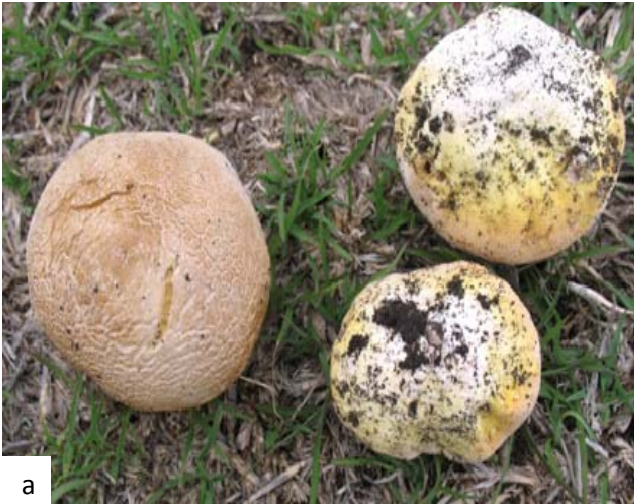

a

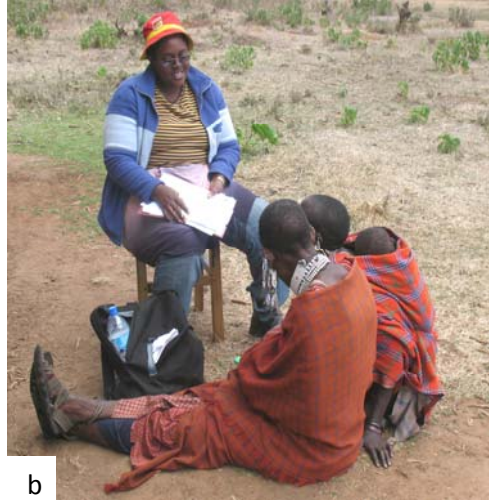

b

Supplement: MOESM2 [file 9627558]
